# Supplementary material
Source: PubMed Central journal article supplement (PMC9933704)
Supplement: aac.01230-22-s0001.pdf [file aac.01230-22-s0001.pdf]

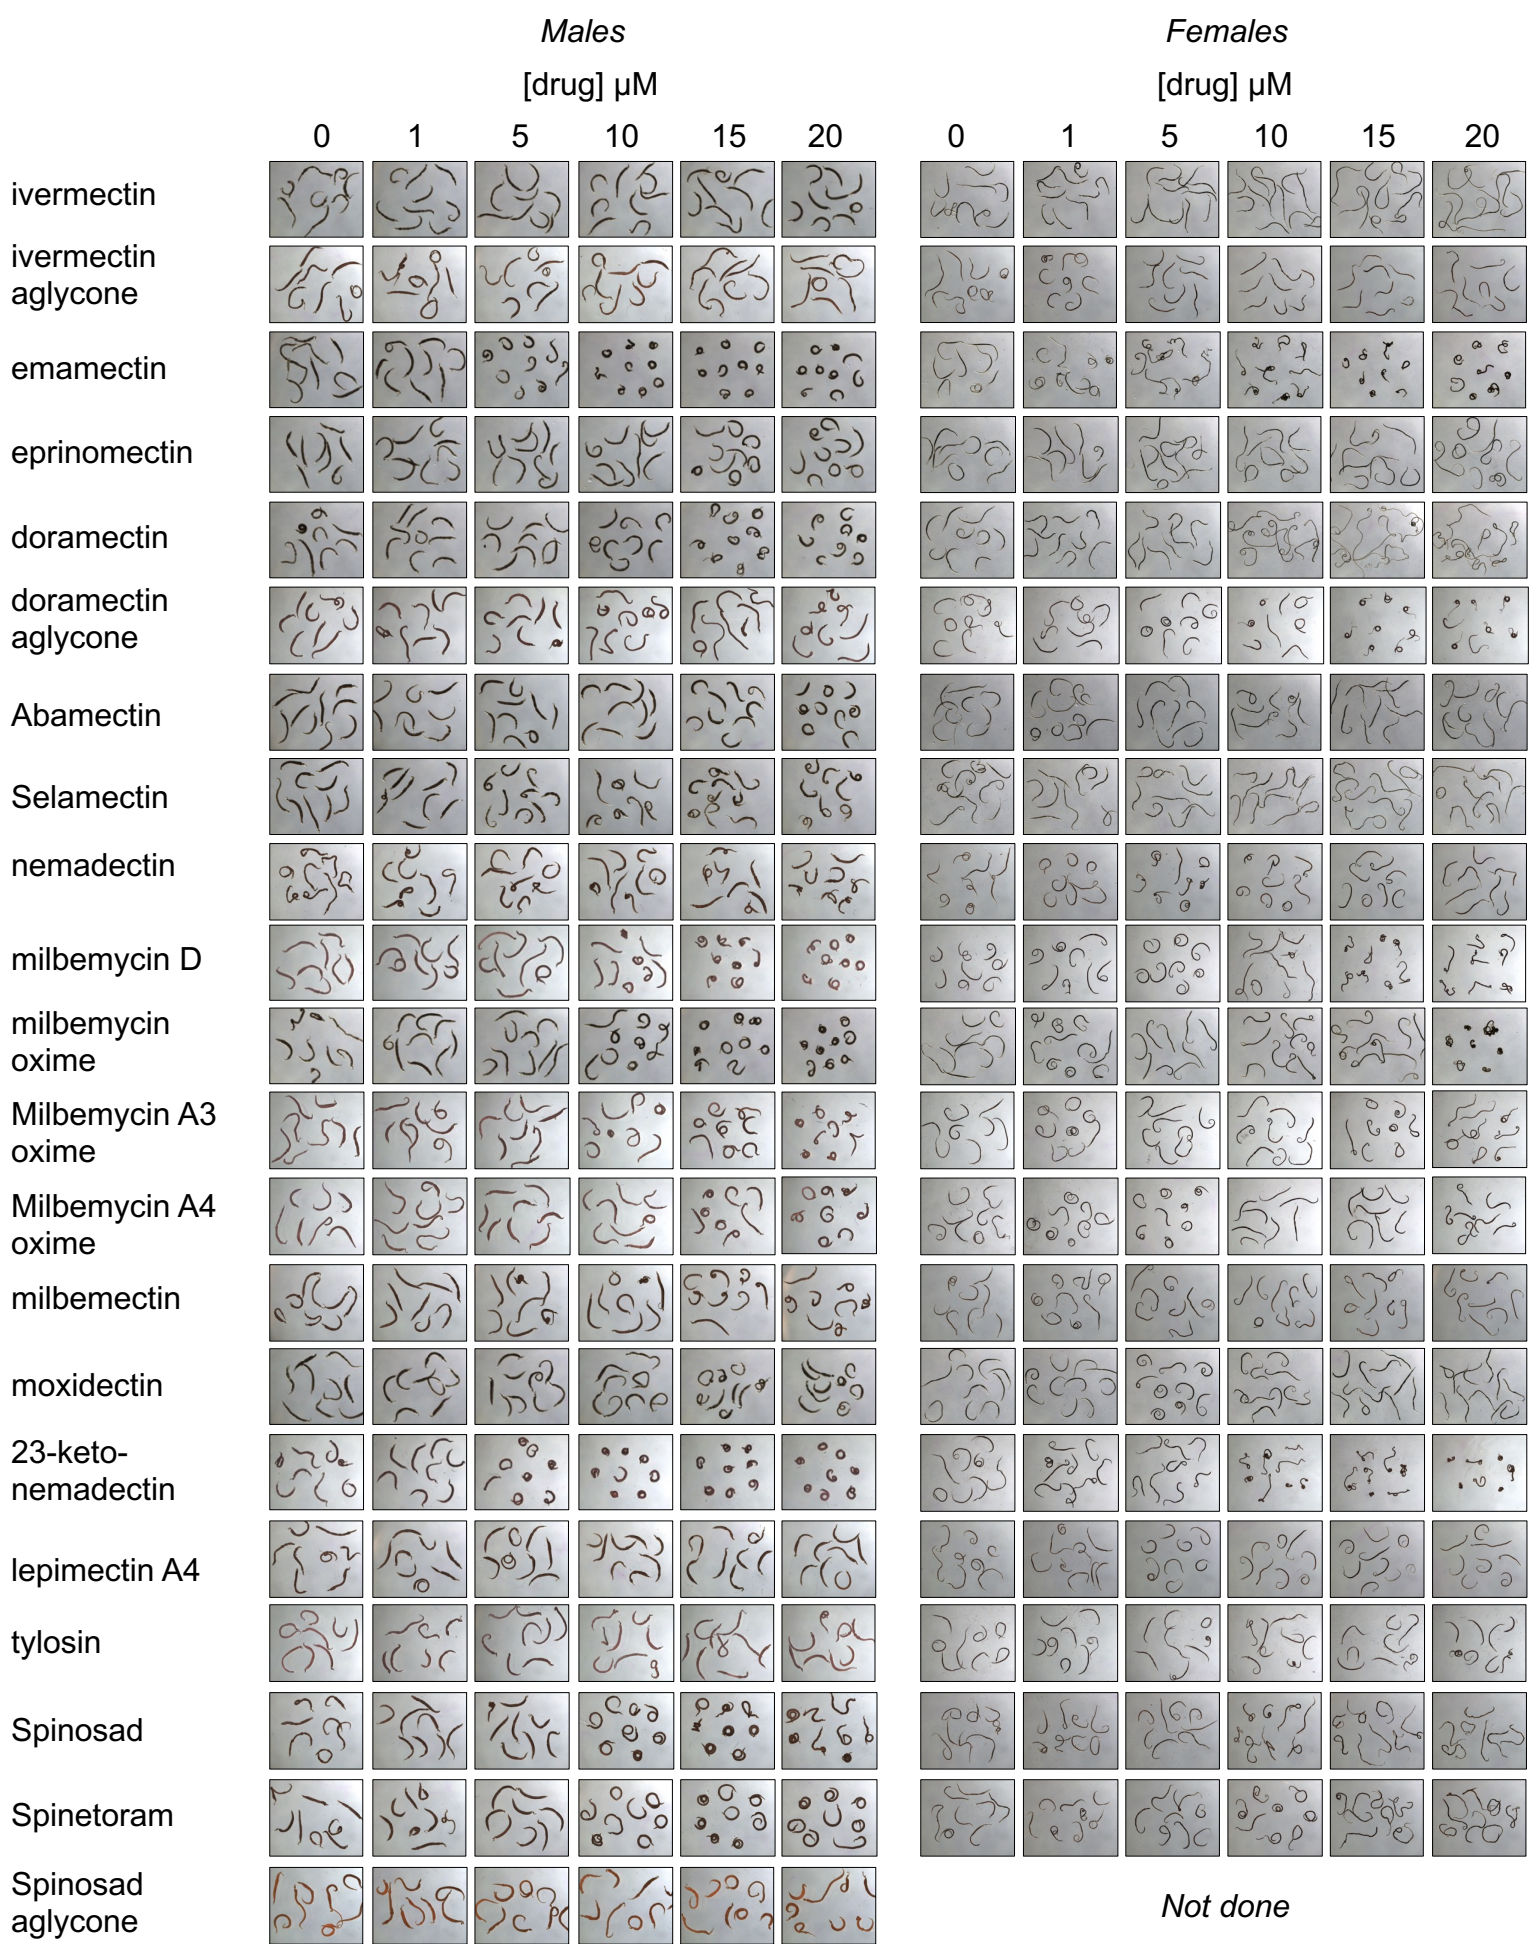

**Supplemental Figure 1. Morphology of schistosomes treated with macrocyclic lactones.**

Morphology of adult male and female *S. mansoni* treated with 21 different macrocyclic lactones for 24 hours.

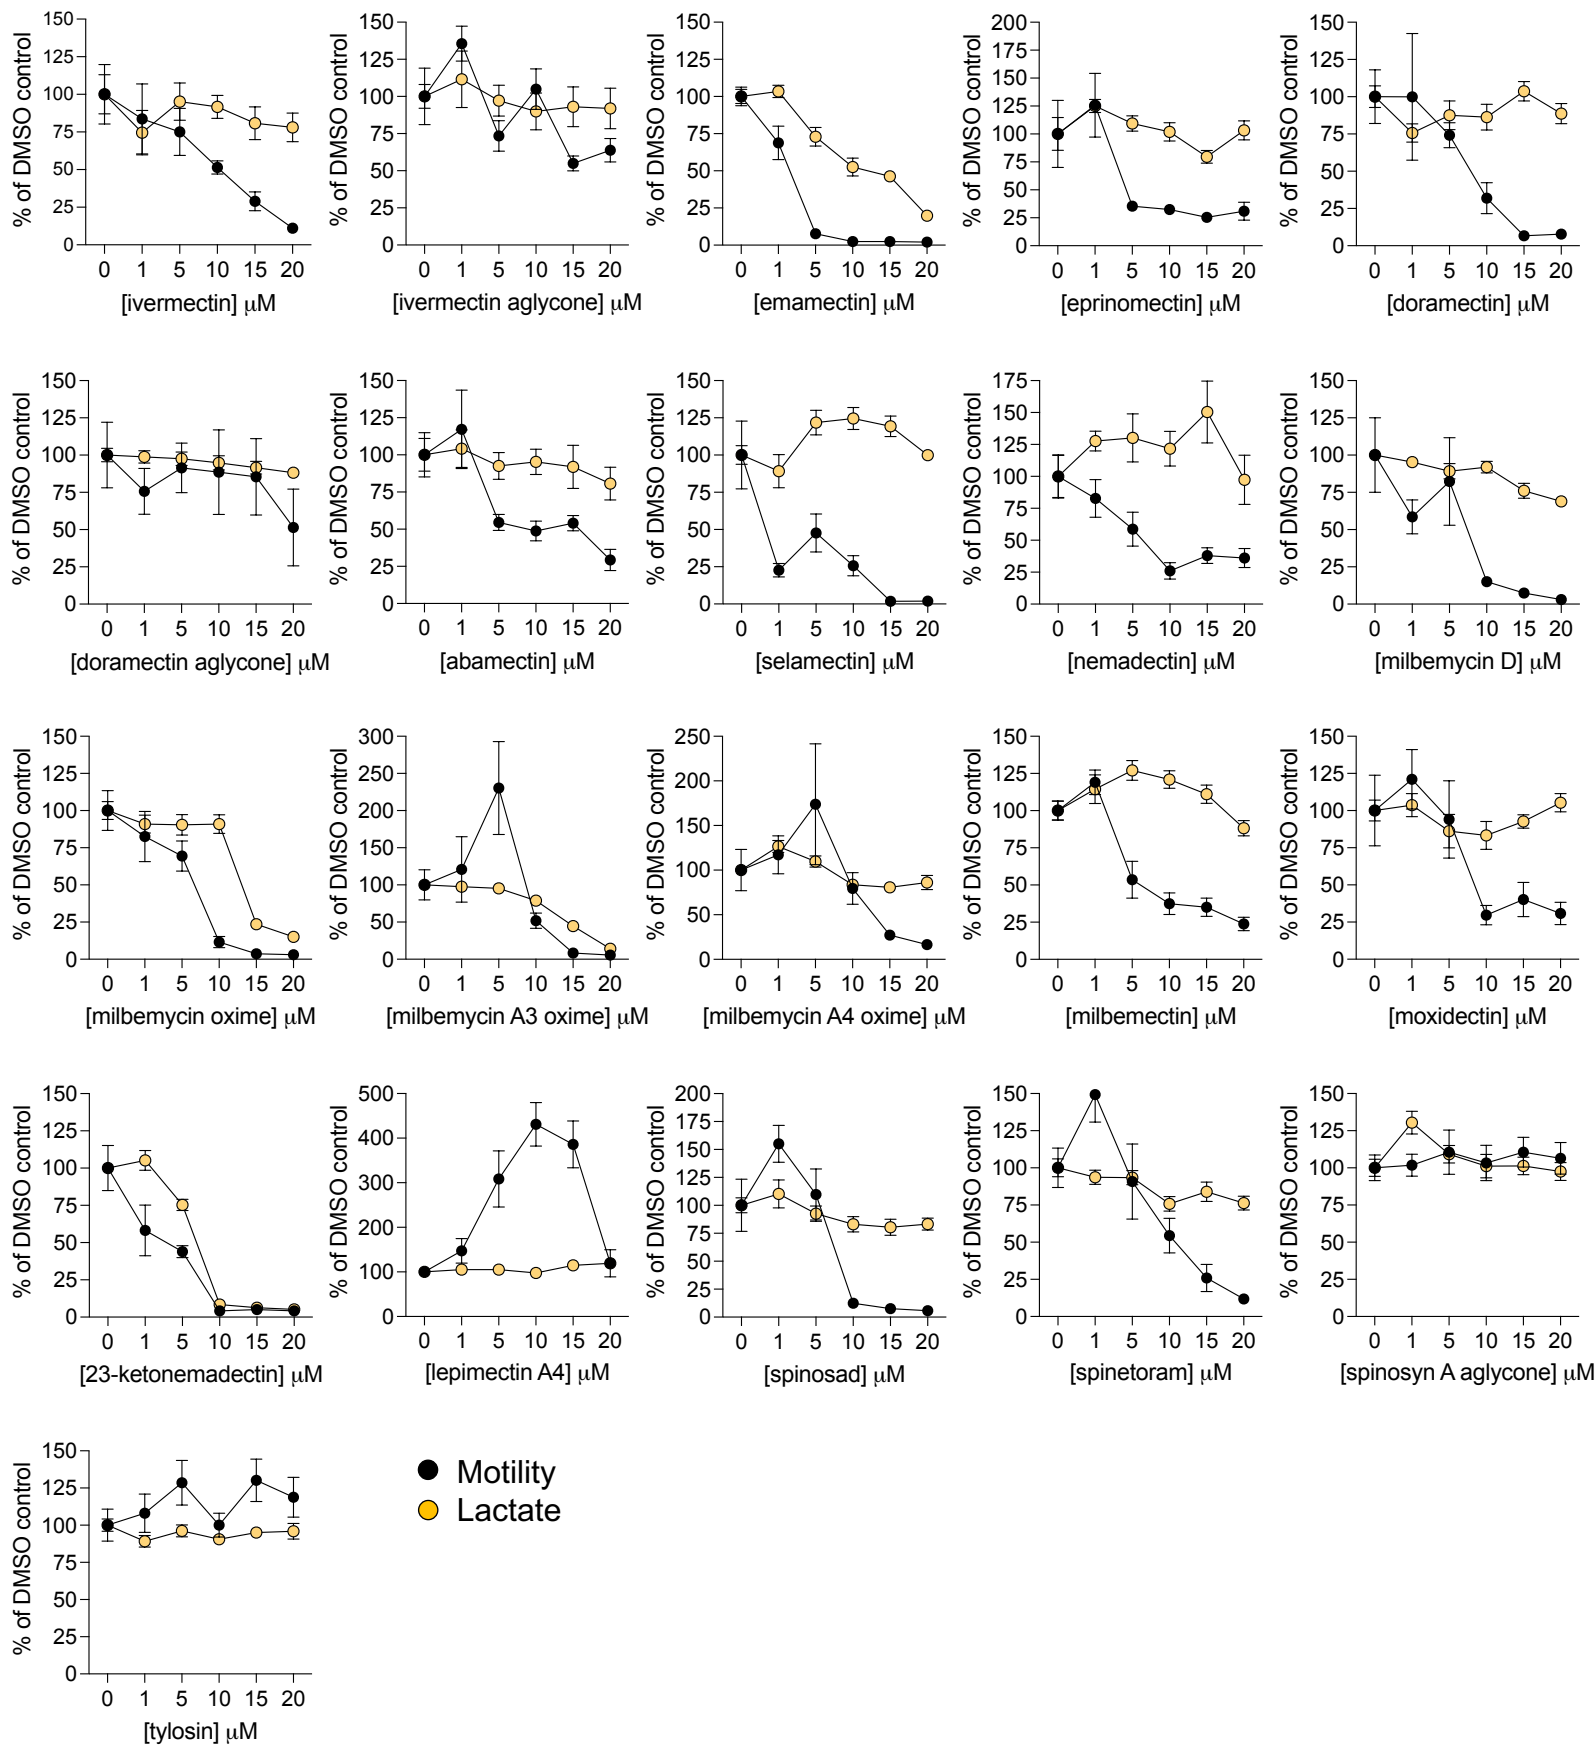

**Supplemental Figure 2. Motility and lactate production of schistosomes treated with macrocyclic lactones.** Motility and lactate production of adult male *S. mansoni* treated with 21 different macrocyclic lactones for 24 hours. Concentration - response curves plotted with motility (black) and lactate (orange), reflecting mean  $\pm$  standard error.

**Supplemental Table 1. Structures of macrocyclic lactones screened in this study.** Names and structures (SMILES IDs) for all compounds screened.
